1 **Earthworms and Cadmium - heavy metal resistant gut bacteria as indicators for heavy**  
2 **metal pollution in soils?**

3 **Heavy metal bacterial indicators in the earthworm gut**

4

5 Maja Šrut<sup>a\*#</sup>, Sebastian Menke<sup>b\*</sup>, Martina Höckner<sup>c</sup>, Simone Sommer<sup>b</sup>

6 <sup>a</sup>University of Zagreb, Faculty of Science, Department of Biology, Rooseveltov trg 6, 10000

7 Zagreb, Croatia

8 <sup>b</sup>University of Ulm, Institute of Evolutionary Ecology and Conservation Genomics, Helmholtzstr.

9 10/1, 89081 Ulm, Germany

10 <sup>c</sup>University of Innsbruck, Institute of Zoology, Technikerstr. 25, 6020 Innsbruck, Austria

11

12 \* These authors contributed equally

13 **# Corresponding author:**

14 Maja Šrut

15 University of Zagreb, Faculty of Science, Department of Biology, Rooseveltov trg 6, 10000

16 Zagreb, Croatia

17 00385 1 4877 700

18 [msrut@biol.pmf.hr](mailto:msrut@biol.pmf.hr)

19 **Abstract**

20 Preservation of the soil resources stability is of paramount importance for the ecosystem,  
21 particularly in the current era of environmental change, which presents a severe pollution burden  
22 (e.g. by heavy metals) to soil ecosystems and its fauna. Gut microbiomes are becoming  
23 recognized as important players in organism health, with comprehension of their perturbations in  
24 the polluted environment offering new insights into the nature and extent of heavy metal effects  
25 on the health of soil biota. Our aim was therefore to evaluate the effect of environmentally  
26 relevant heavy metal concentrations of cadmium (Cd) on the earthworm gut microbiota. Cd  
27 exposure led to perturbations of several heavy metal resistant taxa as well as taxa able to bind  
28 heavy metals, revealing the potential of the earthworm-microbiota system in overcoming human-  
29 caused heavy metal pollution. An ‘indicator species analysis’ linked bacterial genera  
30 *Paenibacillus* and *Flavobacterium*, and members of the order Actinomycetales with Cd  
31 treatment, suggesting the possible use of these bacterial taxa as biomarkers of exposure for Cd-  
32 stressed soils. The results of this study will be essential to understanding of the soil fauna health,  
33 under anthropogenic disturbance, and will have implications for environmental monitoring and  
34 protection of soil resources.

35 **Importance**

36 Soil heavy metal pollution presents a severe burden for soil invertebrates and can have impact on  
37 their health, which in turn reflects on the health of the entire ecosystem. Gut microbiome is  
38 recognized as a central driver of the host health and its shifts can have severe consequences for  
39 the host. In this study we investigated the impact of cadmium (Cd) on earthworm gut microbiota,  
40 in a controlled experiment using cutting edge next generation sequencing and state of the art  
41 bioinformatics tools. The significance of this study is in identifying the gut bacterial taxa which

42 are indicators for Cd treatment and are potential biomarkers of exposure to Cd. Therefore, this  
43 study contributes to develop efficient measures to qualify environmental pollution and to protect  
44 fragile soil resources and ultimately human health.

45

46

47 **Keywords:** soil pollution, cadmium, gut microbiota, indicator species, earthworm, *Lumbricus*

48 *terrestris*

## 49 **Introduction**

50 Environmental pollution by heavy metals poses a severe risk for soil ecosystems. Cadmium (Cd),  
51 one of the main heavy metal soil pollutants, appears in soil ecosystems as a side product of the  
52 metal and mining industry, from usage of fertilizers containing Cd and through air deposition (1).  
53 Heavy metals, including Cd, are linked to various toxic effects in exposed organisms, such as the  
54 induction of oxidative stress, DNA damage and carcinogenesis, and effects on the immune  
55 system (2). Metal-polluted soils also strongly influence soil microbiota and the microbiota of soil  
56 organisms. Several studies have shown a decrease in microbe biodiversity in metal-polluted soils  
57 (3–5). For instance, Cd inhibits microbial reproduction in soil (6), and Cd, copper (Cu), nickel  
58 (Ni), lead (Pb), chromium (Cr), arsenic (As) and zinc (Zn) have been found to decrease the  
59 biomass, species richness and activity of microbial communities in forest and arable soils (7–10).  
60 Microbial communities in heavily polluted soils have been hypothesized to be reduced to only 1  
61 % of that usually observed in pristine soils (11).

62 Earthworms are dominant members of the soil macrofauna and are essential species in  
63 soil. Because of their burrowing activities and casting, earthworms alter the structure of the soil  
64 and thus contribute to the cycling of nutrients and to geochemical soil processes (12).  
65 Earthworms carry out soil biological regulation by mixing organic matter and mineral particles  
66 inside their gut. Further, they maintain the soil structure, and regulate the water content and  
67 availability of nutrients for plants (13). Thereby, they also have an impact on soil microbial  
68 properties, an aspect that is crucial for the stability of soil ecosystems (14). The earthworm gut  
69 represents a unique ecological niche with stable conditions, in contrast to the surrounding soil  
70 conditions (15). Although earthworm gut microbiota have been previously thought to resemble  
71 the bacterial diversity present in its environment, this premise has been discarded with the

72 description of the core earthworm microbiota (14, 16). Bacterial taxa present in the earthworm  
73 gut represent those found in the environment (diet, soil) only to a certain extent. This results from  
74 the filtering and specific milieu in their gut, such as a neutral pH, aerobic conditions, constant  
75 moisture, and high amount of carbon substrate (14). By ingesting soil bacteria during feeding and  
76 burrowing, earthworms act as biological filters for soil microbiota, containing specific  
77 microorganism groups, especially anaerobes (16–18). Additionally, the earthworm gut has the  
78 ability to discriminate between beneficial and harmful bacteria. For instance, some bacteria show  
79 tolerance to the antimicrobial activity of digestive fluids derived from the earthworm gut (19, 20).  
80 The maintained earthworm gut harbours a microbial community that is involved in food  
81 metabolism, thereby establishing bioavailable vitamins and nutrients, and pathogen protection  
82 (20–22). Bacteria involved in these processes fall into one of the four physiological groups: plant  
83 growth promoters, free-living nitrogen fixers, biocides and phosphate solubilizers (13).  
84 Interestingly, the microbiota of different earthworm species harbour comparable proportions of  
85 bacterial phyla. For instance, the core microbiota of *Lumbricus rubellus* comprises of  
86 Actinobacteria and Proteobacteria, with lower abundances of Bacteroidetes and Acidobacteria  
87 (14). In *Eisenia andrei* the majority of the gut microbiota belongs to the phyla Actinobacteria and  
88 Proteobacteria (16). In *E. fetida* and *Perionyx excavates*, the majority of bacteria belongs to the  
89 Proteobacteria and Firmicutes, followed by unclassified bacteria (23).

90 The gut microbiota interacts with ingested heavy metals, acts as an important mediator of  
91 metal bioavailability and toxicity and, furthermore, behaves as a barrier for the uptake of heavy  
92 metals (24). For instance, germ-free mice absorb significantly higher levels of Cd and Pb  
93 compared with control mice and as a result show different expression profiles of genes involved  
94 in metal detoxification and transport (25). Several metals have been linked to alterations in the

95 gut microbiota in vertebrate species, such as Cd (26–29), Ni (30), As and iron (Fe) (31). In  
96 earthworms, environmental exposure to As and Fe causes shifts in the composition of the *L.*  
97 *rubellus* microbiota (14). A healthy and stable gut microbiota plays an important role in host  
98 health and changes in microbiota composition, known as dysbiosis, can have severe  
99 consequences. For instance, the microbiota and the host immunity are well known to be in  
100 continuous interaction, thereby modifying the host immune response (32). Gut microbiota  
101 changes can lead to a misbalance between the host immune system and the gut microbiota, can  
102 trigger immune responses and can lead to immunological diseases (2). Germ free mice have  
103 deficiencies in the development of lymphoid tissue, reduced innate and adaptive immune  
104 response and are more susceptible to infections (33). On the other hand, the immune response of  
105 the host can have an impact on the intestinal microbial composition and its function (34). The  
106 immunological control of the gut microbiota is critical for maintaining intestinal homeostasis and  
107 involves a variety of innate and adaptive components (34). Therefore, the changes in the host gut  
108 microbiota can serve as a first indication of potential misbalance in an organism.

109         Recent studies imply that the changes in gut microbiota structure and function can be used  
110 to evaluate the biological effects of pollutants and to define specific microbiota communities as  
111 biomarkers of exposure (24, 35). Therefore, an understanding of microbiota changes attributable  
112 to exposure to common pollutants in key organisms and the definition of chemically specific  
113 microbiota alterations should improve our comprehension of the nature and extent of pollution  
114 effects and enable better monitoring and preventative measures in the various ecosystems  
115 challenged with anthropogenic pollution.

116         Our aim has been 1) to investigate microbiota shifts in the earthworm *L. terrestris*  
117 exposed to various concentrations of the heavy metal Cd and 2) to identify bacterial indicator

118 sequence variants involved in the first response of the earthworm gut microbiota to Cd stress in  
119 order to propose potential microbiota biomarkers of exposure.

## 120 **Results**

### 121 **Sequencing and assignment of SVs**

122 High-throughput amplicon sequencing of the V4-region of the bacterial 16S rRNA gene from  
123 soil, manure and earthworm faecal samples resulted in a total of 14,815,785 reads. Nine samples  
124 dropped out because of low sequencing depth (max. sequence depth: 7). After quality filtering,  
125 10,247,539 reads remained for the assignment of SVs for 178 samples (min: 30,932; max:  
126 91,298; mean: 57,570; median: 57,710). These reads were assigned to 4,787 SVs (min: 1.0; max:  
127 814; mean: 2,140; median: 52).

### 128 **Soil and manure microbiota**

129 All soil samples had higher  $\alpha$ -diversities than earthworm gut microbiota samples and manure  
130 samples (Figure 2). Soil sampled before earthworm introductions (Soil\_acc) had a slightly higher  
131  $\alpha$ -diversity than soil after earthworm acclimation (Soil\_Cd-0\_pre), but this effect was not  
132 significant (Kruskall-Wallis:  $H = 1.19$ ,  $p = 0.275$ , Figure 2). Interestingly, the control soil  
133 collected after earthworm exposure (Soil\_Cd-0\_post) had a lower, albeit non-significant  
134 (Kruskall-Wallis:  $H = 3.0$ ,  $p = 0.083$ )  $\alpha$ -diversity compared with the Cd-exposed soil (Soil\_Cd-  
135 10/50\_post), indicating that Cd treatment does not cause further decrease of the soil microbiota  
136 diversity, at least in the short term.

137 Neither soil nor manure samples possessed the phylum Tenericutes at proportions seen in  
138 the earthworm gut microbiota (Figure 3). 'Soil\_acc' had a significantly higher abundance of  
139 Firmicutes and a lower abundance of Proteobacteria and Bacteroidetes compared with 'Soil\_Cd-

140 0\_pre' (Figure 3, Table S1, supporting information (SI)). After earthworm acclimation in  
141 experimental soil ('Soil\_Cd-0\_pre', 'Soil\_Cd-0\_post'), the proportion of beta and  
142 gammaproteobacteria increased in comparison with that in 'Soil\_acc', whereas the abundance of  
143 alphaproteobacteria remained the same (Table 1, Table S2 (SI)).

#### 144 **Earthworm gut microbiota changes attributable to Cd treatment**

145 We observed significant differences in  $\alpha$  diversity in the control groups between the first and  
146 second sampling (Figure 2). This indicates that the acclimation period of one month was not  
147 sufficient to stabilize earthworm gut microbiota. Thus, subsequent analyses focused on the  
148 comparisons between 'Cd-0\_post', 'Cd-10\_post', 'Cd-50\_post', manure and soil samples.

149 Our results revealed that Cd exposure caused perturbations in earthworm gut microbiota  
150 composition. A significant increase in  $\alpha$  diversity could be observed for treatment 'Cd-50\_post'  
151 compared with 'Cd-0\_post' (Kruskall-Wallis:  $H = 5.07$ ,  $p = 0.02$ ) (Figure 2). Furthermore,  
152 weighted UniFrac distances were significantly different between treatment groups ( $F_{2,76} = 3.30$ ,  $p$   
153  $= 0.006$ ), which is also evident from the PCoA plot (Figure 4). Moreover, the model containing  
154 'treatment group' as explanatory variable explained more variation than the model without  
155 (Figure 5, Table S3 (SI)).

156 *L. terrestris* microbiota in the combined pre-exposure groups 'Cd-0\_pre', 'Cd-10\_pre'  
157 and 'Cd-50\_pre' mostly consisted of Proteobacteria (32.75 %), Bacteroidetes (26.02 %),  
158 Firmicutes (14.29 %), Tenericutes (3.07 %), Verrucomicrobia (12.15 %) and Actinobacteria (9.28  
159 %). In the control samples 'Cd-0\_post', these relative frequencies differed as follows:  
160 Proteobacteria (34.53 %), Bacteroidetes (18.90 %), Firmicutes (10.94 %), Tenericutes (21.72 %),  
161 Verrucomicrobia (5.08 %) and Actinobacteria (5.96 %) (Figure 3). A significantly higher  
162 abundance of Tenericutes and a lower abundance of Verucromicrobia were evident between all



163 groups before exposure ('Cd-0\_pre', 'Cd-10\_pre', 'Cd-50\_pre') and the control group after the  
164 exposure ('Cd-0\_post') (Table S1 (SI)). Among Proteobacteria in the earthworm gut, the most  
165 abundant were gammaproteobacteria, followed by alphaproteobacteria and betaproteobacteria,  
166 whereas deltaproteobacteria were present in low numbers. The abundance of alpha- and  
167 betaproteobacteria in the earthworm gut was significantly lower in comparison with that in the  
168 soil samples. In contrast, the abundance of gammaproteobacteria was higher in the gut samples,  
169 although not significantly (Table 1, Table S2 (SI)). Cd treatment at the concentration of 50 mg/kg  
170 ('Cd-50\_post') caused significant alteration in the proportion of Actinobacteria in comparison  
171 with the 'Cd-0\_post' group (Figure 3, Table S1 (SI)).

#### 172 **Cd-sensitive and Cd-resistant taxa**

173 A heatmap visualizing all of the balances obtained through Gneiss analysis revealed differences  
174 between the treatment groups (Figure S1 (SI)). In order to identify whether earthworm gut  
175 microbial SVs differed significantly between non-polluted and Cd-polluted groups, we compared  
176 the abundance of SVs by using DESeq2 analysis. Out of the SVs that could be assigned to a  
177 bacterial genus in 'Cd-10\_post', 23 SVs increased, whereas 6 SVs decreased in abundance in  
178 relation to 'Cd-0\_post' (Figure 6a). A strong increase was observed for SVs of the genera  
179 *Flavobacterium* (up to 23.51 fold), *Sanguibacter* (23.24 fold), *Dermacoccus* (7.34 fold),  
180 *Paenibacillus* (6.42 fold), and *Fluviicola* (5.57 fold). A strong negative response was observed  
181 for SVs of the genera *Cryocola* (-6.28 fold) and *Perlucidibaca* (-24.38 fold). In 'Cd-50\_post', 33  
182 SVs increased, whereas 15 SVs decreased in abundance in relation to 'Cd-0\_post' (Figure 6b). A  
183 strong increase was observed for SVs of the genera *Luteolibacter* (up to 23.65 fold),  
184 *Salinbacterium* (23.18 fold), *Cellulomonas* (9.71 fold), *Rhatayibacter* (9.42 fold), *Dermacoccus*  
185 (7.93 fold), *Nocardioides* (6.88 fold), *Paenibacillus* (6.24 fold), *Candidatus xiphinematobacter*

186 (5.74 fold), *Flavobacterium* (5.52 fold), *Chryseobacterium* (5.21 fold) and *Agrobacterium* (4.69  
187 fold). Similar to ‘Cd-10\_post’, a negative response was observed for SVs of the genera *Cryocola*  
188 (-2.63 fold) and *Perlucidibaca* (-4.76 fold).

### 189 **Unique bacterial indicator taxa associated with Cd treatment**

190 Indicator species analysis was employed in order to find predictive patterns of Cd exposure. For  
191 the control treatment (‘Cd-0\_post’), we identified a total of 13 indicator SVs, which included  
192 mostly members of the orders Legionellales and Bacillales. 23 and 57 indicator SVs were linked  
193 to the 10 and 50 mg/kg Cd treatment, respectively. Many of the Cd associated SVs overlapped  
194 between the 10 and 50 mg/kg treatments including mostly members of the genera *Paenibacillus*  
195 and *Flavobacterium*. Other overlaps included the genera *Candidatus*, *Chthoniobacter* and  
196 *Rathayibacter* and the bacterial families Streptomycetaceae, Verrucomicrobiaceae,  
197 Comamonadaceae and Chthoniobacteraceae (Figure 7). In the ‘Cd-50\_post’ treatment group  
198 many indicator taxa belonged to the order Actinomycetales, including the families  
199 Microbacteriaceae (genera *Rathayibacter* and *Agromyces*), Nocardioideaceae (genera  
200 *Nocardioides* and *Pimelobacter*), Nocardiaceae (genus *Rhodococcus*), Dermacoccaceae (genus  
201 *Dermacoccus*), Micrococcaceae and Geodermatophilaceae (Figure 7).

## 202 **Discussion**

### 203 **Earthworm gut microbiota differs from soil and manure microbiota**

204 The  $\alpha$  diversity of earthworm gut samples was lower in comparison with that of soil and manure  
205 samples and, as expected, did not fully represent the microbiota community found in the  
206 experimental soil or manure used for feeding. This is in accordance with previous findings  
207 showing that the microbiota associated with the earthworm gut has a reduced level of diversity

208 and richness compared with the surrounding soil environment (14, 36). The proportion of  
209 Proteobacteria and Bacteroidetes was significantly lower, whereas the proportion of Firmicutes  
210 was significantly higher in ‘Soil\_acc’, in comparison with ‘Soil\_Cd-0\_pre’ and ‘Soil\_Cd-0\_post’,  
211 indicating the profound impact of earthworms on the soil microbial community. Through soil  
212 ingestion, earthworms modify microbial composition and activity by depositing casts in the soil  
213 in which microbes can either flourish or decline (37). As previously shown, earthworm casts have  
214 a similar bacterial composition to the surrounding soil but differ in their proportions (38). Manure  
215 had a higher proportion of Proteobacteria in comparison with ‘Soil\_acc’ and, thus, the combined  
216 influence of the food source and earthworm activity might have led to the observed changes in  
217 the soil microbial composition prior to and after earthworm introduction.

218         The proportion of certain bacterial taxa differed between the earthworm gut and soil  
219 samples after the acclimation period. For instance, gammaproteobacteria were more abundant in  
220 gut samples in comparison with ‘Soil\_Cd-0\_pre’ and ‘Soil\_Cd-0\_post’, whereas alpha- and  
221 betaproteobacteria were less abundant. Similarly, in another study, alpha-, beta- and  
222 gammaproteobacteria declined in the *L. terrestris* gut in comparison with their values in the soil  
223 (39). Additionally, gammaproteobacteria have also been reported to increase in the earthworm  
224 gut and cast samples in comparison with the surrounding soil (38).

225         The phylum Tenericutes, consisting mostly of undetermined orders of the class  
226 Mollicutes, was missing from soil and manure samples but was abundant in the earthworm gut.  
227 The increase of Mollicutes in the gut after the exposure period (2 months in experimental soil) in  
228 comparison with the abundance before exposure (1 month in the experimental soil) indicates that  
229 this phylum is strongly linked to the earthworm gut and is not derived from either soil or food.  
230 Nevertheless, we cannot totally discard the premise that it might be derived from the soil in

231 which earthworms were originally grown by the breeder. However, bacteria from the Mollicutes  
232 class have previously been described in the gut and coelomic fluid of Lumbricidae earthworms,  
233 although no conclusion could be made as to whether the earthworm gut is their specific habitat  
234 (15, 40).

### 235 **Dose-dependent effect of Cd on microbiota of earthworm gut**

236 The most abundant phylum in the *L. terrestris* gut samples was Proteobacteria, followed by  
237 Bacteroidetes, Firmicutes, Tenericutes, Verrucomicrobia and Actinobacteria. This is similar to  
238 the previously described *L. terrestris* gut microbiota composition consisting predominantly of  
239 Proteobacteria, followed by Bacteroidetes and with lower abundances Acidobacteria,  
240 Planctomycetes, Verrucomicrobia and Actinobacteria (15). Proteobacteria also seem to be the  
241 most abundant phyla for other earthworm species. For instance, in *L. rubellus*, Proteobacteria  
242 comprised more than 50 % of the gut microbiota, followed by Actinobacteria, Bacteroidetes and  
243 Acidobacteria, whereas Firmicutes, Chloroflexi and Cyanobacteria appeared in lower proportions  
244 (14). In *E. andrei* the majority of microbiota belonged to the phyla Proteobacteria and  
245 Actinobacteria (16). Similarly, in *E. fetida* and *P. excavates*, the majority of the observed  
246 microorganisms were Proteobacteria, followed by Firmicutes and unclassified bacteria (23).

247 In our study we observed a significant increase in the proportion of Actinobacteria after  
248 50 mg/kg Cd treatment in comparison with the control. Similarly, in mice orally treated with Cd  
249 for 8 weeks, the proportion of Actinobacteria in the cecal content changed significantly at a  
250 concentration of 100 ppm compared with the control (26). Heavy metals have previously been  
251 linked to the alterations of the gut microbiota community in various vertebrate and invertebrate  
252 organisms, including earthworms (14, 26, 30, 31). For Cd, the effects on the microbiota  
253 community have been described only in mice and fish. For instance, sub-chronic exposure of

254 mice to a low dose of Cd caused a decrease in the abundance of Firmicutes and  
255 gammaproteobacteria and an increase in the abundance of Bacteroidetes in the gut and this was  
256 linked to hepatic inflammation and dysregulation of energy metabolism (28). Similarly, a low-  
257 dose Cd exposure in early mouse life stages caused an increase in Bacteroidetes and decrease in  
258 Firmicutes (41). An increase in the abundance of Bacteroidetes bacteria was also observed in Nile  
259 tilapia treated with Cd (29).

260 Bacteria of the phylum Tenericutes and particularly the class Mollicutes decreased in  
261 abundance following Cd treatment at both concentrations compared with the control. Although  
262 this change was not significant, a similar pattern was previously described for Tenericutes in  
263 amphibian gut microbiota exposed to long-term heavy metal pollution (24).

#### 264 **Cd-sensitive and Cd-resistant taxa were determined among earthworm gut microbiota**

265 Many of the genera that showed a Cd-dependent increase in abundance belonged to the phylum  
266 Actinobacteria. Among this phylum, 6 genera showed a particularly strong increase, namely  
267 *Dermacoccus*, *Rathayibacter*, *Nocardioides*, *Sanguibacter*, *Salinbacterium* and *Cellulomonas*.  
268 Increasing numbers of *Rathayibacter*, *Nocardioides* and *Cellulomonas* attributable to Cd  
269 treatment can be explained by their reported resistance to heavy metal toxicity. Metal tolerant  
270 strains of *Rathayibacter* have been found in soils with historic heavy metal contamination (42,  
271 43). Similarly, *Nocardioides* has a high adaptive potential to survive and maintain metabolic  
272 activity under extreme conditions (heavy metals, UV, nuclear radiation) (44). *Cellulomonas sp.*  
273 has been reported to be highly resistant to heavy metals and the *C. hominis* N2 strain has the  
274 ability to produce a biosurfactant, that might help to overcome heavy metal toxicity (45, 46). The  
275 abundance of several phyla with a reported resistance to heavy metals increased in our study,  
276 namely *Paenibacillus*, *Flavobacterium*, *Chryseobacterium* and *Agrobacterium*. Some of the

277 *Paenibacillus* strains can survive high heavy metal concentrations and their possible role in heavy  
278 metal decontamination makes them possible candidates for heavy metal bioremediation (47, 48).  
279 Likewise, *Flavobacterium* species show resistance to some heavy metals (Cd, Cu) and their  
280 abundance in Nile tilapia gut upon exposure to Cd was significantly increased (29, 49).  
281 *Chryseobacterium solincola* can grow despite the elevated presence of highly toxic metals and  
282 has been suggested as a candidate for the situ bioremediation of heavy metals in aqueous or soil  
283 systems (50). *Agrobacterium tumefaciens* is able to survive in regions containing high levels of  
284 heavy metals and possesses various transporters involved in Ni, Cu, Zn and Cr resistance (51,  
285 52). SVs of the genera *Cryocola* and *Perlucidibaca* significantly decreased in abundance in both  
286 Cd treatments. This is in contrast to previous findings reporting a positive correlation of  
287 *Perlucidibaca* bacteria with Cd content in samples of polluted river sludge (53).

### 288 **Unique bacterial indicators as potential biomarkers of exposure to Cd**

289 In order to reveal a unique microbiota footprint in the earthworm gut attributable to Cd exposure,  
290 we have identified indicator SVs by using indicator species analysis (54). This analysis has  
291 previously been used to characterise microbial taxa in the human gut related to diverse diets (55),  
292 in order to reveal microbial biomarkers of disease (56), to define microbial taxa associated with  
293 various environments (57) and, most recently, to identify biomarkers of exposure to chemical  
294 pollution in fish (35). The authors of the last-mentioned study suggest that the characterization of  
295 indicator SVs of the microbiota exposed to environmental chemicals may be useful in  
296 environmental and health monitoring. Many of the indicator SVs associated with Cd exposure in  
297 our study belonged to the genera *Paenibacillus* and *Flavobacterium*. These genera also showed  
298 increasing numbers following Cd treatment in the DESeq analysis. Members of these genera are  
299 soil-derived denitrifiers or dissimilatory nitrate reducers in the earthworm gut and contribute to

300 the nitrous oxide emissions and help in organic matter digestion by providing hydrolytic enzymes  
301 (58). Many of the other Cd-associated indicator SVs belonged to the order Actinomycetales,  
302 including genera *Dermacoccus*, *Rathayibacter* and *Nocardioides*, which were also significantly  
303 associated with Cd treatment in the DESeq2 analysis. Other indicator taxa from this order were  
304 genera *Streptomyces*, *Agromyces*, *Pimelobacter* and *Rhodococcus* and families Micrococcaceae  
305 and Geodermatophilaceae. Actinomycetales genera *Streptomyces*, *Rathayibacter*, *Nocardioides*,  
306 *Agromyces* and *Rhodococcus* have been associated with the soil and earthworm cast and gut. The  
307 genus *Streptomyces* has antimicrobial activity and enzyme production capability in the  
308 earthworm gut (59). Furthermore, *Streptomyces caeruleus* has been found to help earthworms in  
309 organic matter metabolism and plant material decomposition (60). *Rathayibacter* is a known  
310 genus of soil bacteria and contains plant pathogens (61). *Nocardioides* has been associated with  
311 the cast of the earthworm *E. andrei* (62) and *Agromyces* bacteria and the *Rhodococcus* strain has  
312 been isolated from the earthworm gut (63, 64). Evidence has been presented for the metal  
313 tolerance for these Actinomycetales indicator taxa. *Streptomyces* strains bioaccumulate various  
314 heavy metals (Zn, Cu, Cd, Cr, Ni, Sr, U) and are able to remove Zn from soil (65). The species  
315 *Agromyces aureus* was isolated from a zinc/lead mine and is described as a heavy-metal-resistant  
316 bacteria, with a resistance of up to 1 mM of Cd (66). *Rhodococcus opacus* has been described to  
317 be able to remove heavy metals from the media by active bioaccumulation and to possess  
318 tolerance to a range of heavy metals, including Cd (67, 68). Various species of the  
319 Micrococcaceae family have been reported as being resistant to high levels of heavy metals,  
320 including Cd (69), and members of the Geodermatophilaceae family have been determined to be  
321 tolerant to a range of stresses, including heavy metals (70). Among other indicator SVs, those  
322 that were associated with both low and high Cd treatments included the genera *Candidatus* and  
323 *Chthoniobacter* and the families Verrucomicrobiaceae, Comamonadaceae and

324 Chthoniobacteraceae. The genus *Chthoniobacter* and the family Verrucomicrobiaceae have been  
325 found in soil ecosystems and *Chthoniobacter* is probably involved in the breakdown of organic  
326 carbon in soil (71, 72). Members of the phylum Verrucomicrobia have been detected in mercury-  
327 contaminated sites (73). Comamonadaceae of the phylum Proteobacteria have been isolated from  
328 the digestive tracts of diverse earthworm species (74) and some bacterial strains of this family  
329 have been associated with arsenic-contaminated earthworm microbiotas and are described to  
330 carry arsenic-resistance genes (14, 75). Defined indicator SVs for both low and high Cd  
331 treatments might serve as a catalogue of biomarkers of exposure to Cd and be used for future  
332 biomonitoring programmes in which earthworms could be used as an appropriate model to  
333 describe bacterial indicator taxa for human-caused environmental pollutants.

334         Because of the high extent of chemical exposure to soil organisms and the overall role of  
335 the gut microbiota for organism health, the description and comprehension of the effects of  
336 chemical exposure on the microbiota are of high importance. The overall results of this study  
337 should help us to understand the dynamics and the effects of heavy metal pollution on the  
338 microbiota of key soil invertebrates and thereby to contribute to measures for preserving  
339 environmental health.

## 340 **Materials and methods**

### 341 **Earthworm exposure and sampling**

342 All *L. terrestris* specimens and soil (80 g dry soil per earthworm) used for earthworm exposure  
343 (mixture of peat and humus) were obtained from the company Wurmwelten/Germany  
344 ([www.wurmwelten.de](http://www.wurmwelten.de)). Ninety adult earthworms originating from a single population were  
345 reared at 15°C in a 12h/12h light/dark cycle in heat-treated soil (120°C, 12 h) with a soil water  
346 content of 50% and fed weekly with horse manure (1.2 g manure per individual) for 4 weeks



347 prior to the start of the experiments (acclimation period). Following this acclimation period,  
348 earthworms were divided into three groups of 30 individuals that were exposed either to control  
349 soil or to 10 mg/kg or 50 mg/kg CdCl<sub>2</sub> for 4 weeks. The gut content of earthworms was sampled  
350 prior to and after exposure. Gut samples collected prior to exposure were labelled as 'Cd-0\_pre',  
351 'Cd-10\_pre' and 'Cd-50\_pre', whereas samples collected after the exposure are labelled 'Cd-  
352 0\_post', 'Cd-10\_post' and 'Cd-50\_post'. The experimental setup is schematically shown in  
353 Figure 1. Faecal matter was collected by placing individual earthworms overnight at 15°C in the  
354 dark on a sterile moist filter paper placed in a Petri dish. The released pellet was collected by  
355 using a sterile spatula, placed in a 1.5 ml tube, flash-frozen in liquid nitrogen and stored at -80°C  
356 until further processing. In addition, soil and manure samples were collected in order to  
357 investigate their microbiota communities. 'Soil\_acc' refers to samples of freshly prepared  
358 experimental soil for acclimation before the introduction of earthworms, 'Soil\_Cd-0\_pre' refers  
359 to soil samples collected after 4 weeks of earthworm acclimation, 'Soil\_Cd-0\_post' refers to soil  
360 samples with the treatment 'Cd-0\_post' and 'Soil\_Cd-10/50\_post' refers to soil samples from  
361 'Cd-10\_post' and 'Cd-50\_post' treatments, which were grouped together because some of the  
362 replicas were not successfully sequenced.

### 363 **DNA extraction, library preparation and sequencing**

364 We used 200 mg earthworm gut content, soil and manure samples for DNA extraction by using  
365 the NucleoSpin 96 Soil kit (Macherey&Nagel). Mechanical lysis was performed for 2x2.5min at  
366 50 Hz by using the Analytic Jena Homogenizer.

367 For library preparation, we applied the Fluidigm (Access Array<sup>TM</sup> System for Illumina  
368 Sequencing Systems, Fluidigm Corporation) approach and chemistry for simultaneous PCR and  
369 barcoding. A 291-bp fragment of the hypervariable V4 region of the 16S rRNA gene was

370 targeted by using the primers 515F (5'-GTGCCAGCMGCCGCGGTAA-3') and 806R (5'-  
371 GGACTACHVGGGTWTCTAAT-3') (76, 77). The primers were modified according to the  
372 Fluidigm protocol and were tagged with sequences (CS1 forward tag and CS2 reverse tag) that  
373 were complementary to the forward or reverse access array barcode primers for Illumina. The  
374 reaction was performed in 15 µl and consisted of 10 ng/µl template DNA, 1X FastStart  
375 HighFidelity Reaction buffer without MgCl<sub>2</sub> (Roche), 4.5 nM MgCl<sub>2</sub> (Roche), 5% DMSO  
376 (Roche), 200 µM of each PCR grade nucleotide (Roche), 0.05 U/µl FastStart High Fidelity  
377 Enzyme blend (Roche), 400 nM access array barcode primers for Illumina (Fluidigm), 200 nM  
378 target specific primers and 14% PCR certified water. PCR cycles were performed according to  
379 the Fluidigm protocol. Subsequently, the PCR samples were cleaned by using NucleoMag NGS  
380 Beads (Machery&Nagel) according to manufacturer's recommendations and the cleaned libraries  
381 were quality checked with capillary electrophoresis on the Qiaxcel Advanced system (Qiagen)  
382 and quantified by using the Quant-iT™ PicoGreen® kit (Invitrogen/Life Technologies). Samples  
383 were pooled with equal amounts of 150 ng DNA/sample. Finally, pooled samples were diluted to  
384 8 nM in hybridization buffer and libraries were sequenced as paired-end run on Illumina®  
385 MiSeq.

### 386 **Bioinformatic analyses with qiime2**

387 Pre-processing of sequencing reads was carried out by using qiime2 (version 2017.10) ((78),  
388 <https://qiime2.org>) and its plugins. Specifically, we used the 'demux' plugin  
389 (<https://github.com/qiime2/q2-demux>) for the import of our demultiplexed paired-end sequencing  
390 reads and the creation of the 'artifact' file (i.e. qiime2 data format required for subsequent  
391 analyses). Further, we applied the 'dada2' plugin (79), by using the default parameter settings for  
392 quality filtering and chimera filtering, to trim primers (--p-trim-left-f 23, --p-trim-left-r 20), to

393 truncate forward and reverse reads (--p-trunc-len-f 200, --p-trunc-len-r 200) and finally to  
394 collapse reads into representative sequences, the so-called sequence variants (SVs). We assigned  
395 taxonomy to these SVs against the Greengenes database (version 13\_8) by using the ‘feature-  
396 classifier’ plugin (<https://github.com/qiime2/q2-feature-classifier>) with the ‘fit-classifier-sklearn’  
397 method and produced taxa summary barplots (<https://github.com/qiime2/q2-taxa>) according to  
398 sample groupings.

399 In order to carry out diversity analyses, which are based on bacterial phylogeny, we  
400 produced a mid-point rooted bacterial phylogenetic tree by aligning SV with MAFFT (80), by  
401 removing non-informative positions in the alignment with the ‘mask’ command  
402 (<https://github.com/qiime2/q2-alignment>) and by using Fast Tree 2 (81) for tree construction. The  
403 ‘diversity’ plugin (<https://github.com/qiime2/q2-diversity>) was employed to calculate alpha  
404 (phylogenetic diversity, (82)) and beta diversities (weighted UniFrac, (83)) based on 30,000  
405 sequences per earthworm microbiota. Significant differences between treatment groups were  
406 calculated with a PERMANOVA approach also included in qiime 2.

407 Finally, in order to be able to undertake further analyses in R (84), we exported the non-  
408 rarefied ‘feature-table’ (feature-table.biom), the bacterial phylogenetic tree (tree.nwk), and the  
409 taxonomy from qiime2 ‘artifacts’. We converted the ‘feature-table.biom’ file into a text file and  
410 then added the taxonomy in the last column and reconverted this text file into a ‘feature-  
411 table\_tax.biom’ file both using the ‘biom convert’ command in qiime2 (<http://biom-format.org>,  
412 (85)).

### 413 **Statistical analyses in R**

414 We imported and combined the ‘feature-table\_tax.biom’ file, the bacterial phylogenetic tree, and  
415 a text file containing the metadata into R by using the phyloseq package (86). We produced the

416 barplot including all treatments, the PCoA and the network plot based on weighted UniFrac  
417 distances between samples from ‘Cd-0\_post’, ‘Cd-10\_post’ and ‘Cd-50\_post’ (rarefied feature-  
418 table; 30,000 sequences per sample). For the network analysis, we employed the default  
419 dissimilarity index (Jaccard, co-occurrence), with a maximum distance of 0.4 required to create  
420 an edge. To test whether the earthworm gut microbiota connectedness was higher within than  
421 between treatment groups, we extracted edges and nodes information from the network graph  
422 object using the R package ‘igraph’ (Csardi and Nepusz, 2006). We then produced a new network  
423 object using the ‘asNetwork’ function from the R package ‘intergraph’ (88) to apply an  
424 approximate maximum likelihood estimate based on a Monte Carlo scheme using the R package  
425 ‘ergm’ (89). We tested whether a model including nodes (factor ‘treatment group’) in addition to  
426 ‘edges’ explained the variation better than a model with only ‘edges’ using a chi-squared test.

427         To investigate those bacterial SVs that differed significantly between earthworms from  
428 the control and Cd-polluted groups, we applied ‘DESeq2’ (90) within ‘phyloseq’ and we further  
429 tested whether the SV read abundances differed between treatment groups at the genus and  
430 phylum level by using ANOVA and the Post-Hoc Tukey HSD test.

431         Finally, we tested those bacterial taxa from earthworm microbiotas that were significantly  
432 attributable to ‘Cd-0\_post’, ‘Cd-10\_post’ or ‘Cd-50\_post’ by applying an ‘indicator species  
433 analysis’ with 999 permutations (R package ‘indicspecies’ (54)). This method enabled us to  
434 analyse the relative abundance and occurrence of SVs in samples of the various treatment groups  
435 in order to identify the SVs that significantly characterized the respective groups. The maximal  
436 index of 1 indicated that a certain SV was present in all individuals of the group of interest. An  
437 indicator value less than 1 meant that the SV was either present in more than one group or that it

438 was not present in all members of this group. This method has been previously suggested for the  
439 definition of biomarkers of exposure to chemicals (35).

#### 440 **Acknowledgements**

441 We are grateful to Kerstin Wilhelm for laboratory guidance of M.S. during her visit at the  
442 Institute for Evolutionary Ecology and Conservation Genomics at the University of Ulm and  
443 Victoria Drechsel from the University of Innsbruck, for help with earthworm maintenance and  
444 feeding. S.S thanks the Ministry of Science, Research and Art, Baden-Württemberg for start-up  
445 funding of the EcoHealth initiative 'Microbial Drivers in Plant and Animal Health'.

#### 446 **Author contribution**

447 M.S., M.H., S.M., and S.S. conceived the study. M.S. developed the theory and performed the  
448 laboratory work. S.M. performed bioinformatic analyses. M.S. and S.M. carried out the statistical  
449 analyses. M.S. and S.M. wrote the manuscript. M.H. and S.S. critically reviewed the manuscript.  
450 The authors declare that there is no conflict of interest.

#### 451 **References**

- 452 1. Järup L, Akesson A. 2009. Current status of cadmium as an environmental health problem.  
453 *Toxicol Appl Pharmacol* 238:201–8.
- 454 2. Jin Y, Wu S, Zeng Z, Fu Z. 2017. Effects of environmental pollutants on gut microbiota.  
455 *Environ Pollut* 222:1–9.
- 456 3. Gremion F, Chatzinotas A, Harms H. 2003. Comparative 16S rDNA and 16S rRNA  
457 sequence analysis indicates that Actinobacteria might be a dominant part of the  
458 metabolically active bacteria in heavy metal-contaminated bulk and rhizosphere soil.  
459 *Environ Microbiol* 5:896–907.

- 460 4. Bamborough L, Cummings SP. 2009. The impact of zinc and lead concentrations and  
461 seasonal variation on bacterial and actinobacterial community structure in a metallophytic  
462 grassland soil. *Folia Microbiol (Praha)* 54:327–34.
- 463 5. Singh BK, Quince C, Macdonald CA, Khachane A, Thomas N, Al-Soud WA, Sørensen SJ,  
464 He Z, White D, Sinclair A, Crooks B, Zhou J, Campbell CD. 2014. Loss of microbial  
465 diversity in soils is coincident with reductions in some specialized functions. *Environ*  
466 *Microbiol* 16:2408–20.
- 467 6. Chen YP, Liu Q, Liu YJ, Jia FA, He XH. 2014. Responses of soil microbial activity to  
468 cadmium pollution and elevated CO<sub>2</sub>. *Sci Rep* 4:4287.
- 469 7. Chodak M, Gołębiewski M, Morawska-Płoskonka J, Kuduk K, Niklińska M. 2013.  
470 Diversity of microorganisms from forest soils differently polluted with heavy metals. *Appl*  
471 *Soil Ecol* 64:7–14.
- 472 8. Frostegård A, Tunlid A, Bååth E. 1993. Phospholipid Fatty Acid Composition, Biomass,  
473 and Activity of Microbial Communities from Two Soil Types Experimentally Exposed to  
474 Different Heavy Metals. *Appl Environ Microbiol* 59:3605–17.
- 475 9. Gołębiewski M, Deja-Sikora E, Cichosz M, Tretyn A, Wróbel B. 2014. 16S rDNA  
476 pyrosequencing analysis of bacterial community in heavy metals polluted soils. *Microb*  
477 *Ecol* 67:635–47.
- 478 10. Sheik CS, Mitchell TW, Rizvi FZ, Rehman Y, Faisal M, Hasnain S, McInerney MJ,  
479 Krumholz LR. 2012. Exposure of Soil Microbial Communities to Chromium and Arsenic  
480 Alters Their Diversity and Structure. *PLoS One* 7:e40059.
- 481 11. Gans J, Wolinsky M, Dunbar J. 2005. Computational improvements reveal great bacterial

- 482 diversity and high metal toxicity in soil. *Science* 309:1387–90.
- 483 12. Liu D, Lian B, Wang B, Jiang G. 2011. Degradation of potassium rock by earthworms and  
484 responses of bacterial communities in its gut and surrounding substrates after being fed  
485 with mineral. *PLoS One* 6:e28803.
- 486 13. Brito-Vega H, Espinosa-Victoria D. 2009. Bacterial diversity in the digestive tract of  
487 earthworms (Oligochaeta). *J Biol Sci* 9:192–199.
- 488 14. Pass DA, Morgan AJ, Read DS, Field D, Weightman AJ, Kille P. 2015. The effect of  
489 anthropogenic arsenic contamination on the earthworm microbiome. *Environ Microbiol*  
490 17:1884–96.
- 491 15. Nechitaylo TY, Yakimov MM, Godinho M, Timmis KN, Belogolova E, Byzov BA,  
492 Kurakov A V, Jones DL, Golyshin PN, Belogolova E, Golyshin PN, Yakimov MM, Byzov  
493 BA, Kurakov A V, Timmis KN, Jones DL. 2010. Effect of the Earthworms *Lumbricus*  
494 *terrestris* and *Aporrectodea caliginosa* on Bacterial Diversity in Soil. *Microb Ecol* 59:574–  
495 587.
- 496 16. Aira M, Bybee S, Pérez-Losada M, Domínguez J. 2015. Feeding on microbiomes: effects  
497 of detritivory on the taxonomic and phylogenetic bacterial composition of animal manures.  
498 *FEMS Microbiol Ecol* 91:1–10.
- 499 17. Drake HL, Horn MA. 2007. As the Worm Turns: The Earthworm Gut as a Transient  
500 Habitat for Soil Microbial Biomes. *Annu Rev Microbiol* 61:169–189.
- 501 18. Knapp B a., Podmirseg SM, Seeber J, Meyer E, Insam H. 2009. Diet-related composition  
502 of the gut microbiota of *Lumbricus rubellus* as revealed by a molecular fingerprinting  
503 technique and cloning. *Soil Biol Biochem* 41:2299–2307.

- 504 19. Khomyakov N V., Kharin SA, Nechitailo TY, Golyshin PN, Kurakov A V., Byzov BA,  
505 Zvyagintsev DG. 2007. Reaction of microorganisms to the digestive fluid of earthworms.  
506 *Microbiology* 76:45–54.
- 507 20. Dishaw LJ, Cannon JP, Litman GW, Parker W. 2014. Immune-directed support of rich  
508 microbial communities in the gut has ancient roots. *Dev Comp Immunol* 47:36–51.
- 509 21. Parthasarathi K, Ranganathan LS, Anandi V, Zeyer J. 2007. Diversity of microflora in the  
510 gut and casts of tropical composting earthworms reared on different substrates. *J Environ*  
511 *Biol* 28:87–97.
- 512 22. Idowu AB, Edema MO, Adeyi AO. 2008. Gut Microflora and Microfauna of Earthworm  
513 Species in the Soils of the Research Farms of the University of Agriculture, Abeokuta,  
514 Nigeria. *Biol Agric Hortic* 25:185–200.
- 515 23. Singh A, Singh DP, Tiwari R, Kumar K, Singh RV, Singh S, Prasanna R, Saxena AK,  
516 Nain L. 2015. Taxonomic and functional annotation of gut bacterial communities of  
517 *Eisenia foetida* and *Perionyx excavatus*. *Microbiol Res* 175:48–56.
- 518 24. Zhang W, Guo R, Yang Y, Ding J, Zhang Y. 2016. Long - term effect of heavy - metal  
519 pollution on diversity of gastrointestinal microbial community of *Bufo raddei*. *Toxicol Lett*  
520 258:192–197.
- 521 25. Breton J, Daniel C, Dewulf J, Pothion S, Froux N, Sauty M, Thomas P, Pot B, Foligné B.  
522 2013. Gut microbiota limits heavy metals burden caused by chronic oral exposure. *Toxicol*  
523 *Lett* 222:132–138.
- 524 26. Breton J, Massart S, Vandamme P, De Brandt E, Pot B, Foligné B. 2013. Ecotoxicology  
525 inside the gut: impact of heavy metals on the mouse microbiome. *BMC Pharmacol Toxicol*



- 526 14:1–11.
- 527 27. Liu Y, Li Y, Liu K, Shen J. 2014. Exposing to cadmium stress cause profound toxic effect  
528 on microbiota of the mice intestinal tract. *PLoS One* 9:e85323.
- 529 28. Zhang S, Jin Y, Zeng Z, Liu Z, Fu Z. 2015. Subchronic Exposure of Mice to Cadmium  
530 Perturbs Their Hepatic Energy Metabolism and Gut Microbiome. *Chem Res Toxicol*  
531 28:2000–9.
- 532 29. Zhai Q, Yu L, Li T, Zhu J, Zhang C, Zhao J, Zhang H, Chen W. 2017. Effect of dietary  
533 probiotic supplementation on intestinal microbiota and physiological conditions of Nile  
534 tilapia (*Oreochromis niloticus*) under waterborne cadmium exposure. *Antonie Van*  
535 *Leeuwenhoek* 110:501–513.
- 536 30. Wu B, Cui H, Peng X, Pan K, Fang J, Zuo Z, Deng J, Wang X, Huang J. 2014.  
537 Toxicological effects of dietary nickel chloride on intestinal microbiota. *Ecotoxicol*  
538 *Environ Saf* 109:70–6.
- 539 31. Guo X, Liu S, Wang Z, Zhang X, Li M, Wu B. 2014. Metagenomic profiles and antibiotic  
540 resistance genes in gut microbiota of mice exposed to arsenic and iron. *Chemosphere*  
541 112:1–8.
- 542 32. McPhee JB, Schertzer JD. 2015. Immunometabolism of obesity and diabetes: microbiota  
543 link compartmentalized immunity in the gut to metabolic tissue inflammation. *Clin Sci*  
544 (Lond) 129:1083–1096.
- 545 33. Round JL, Mazmanian SK. 2009. The gut microbiota shapes intestinal immune responses  
546 during health and disease. *Nat Rev Immunol* 9:313–23.
- 547 34. Palm NW, de Zoete MR, Flavell R a. 2015. Immune-microbiota interactions in health and

- 548 disease. *Clin Immunol* 159:122–127.
- 549 35. Gaulke CA, Barton CL, Proffitt S, Tanguay RL, Sharpton TJ. 2016. Triclosan exposure is  
550 associated with rapid restructuring of the microbiome in adult zebrafish. *PLoS One* 11:1–  
551 20.
- 552 36. Gómez-Brandón M, Aira M, Lores M, Domínguez J. 2011. Epigeic Earthworms Exert a  
553 Bottleneck Effect on Microbial Communities through Gut Associated Processes. *PLoS*  
554 *One* 6:e24786.
- 555 37. Aira M, Domínguez J. 2014. Changes in nutrient pools, microbial biomass and microbial  
556 activity in soils after transit through the gut of three endogeic earthworm species of the  
557 genus *Postandrilus* Qui and Bouché, 1998. *J Soils Sediments* 14:1335–1340.
- 558 38. Furlong MA, Singleton DR, Coleman DC, Whitman WB. 2002. Molecular and culture-  
559 based analyses of prokaryotic communities from an agricultural soil and the burrows and  
560 casts of the earthworm *Lumbricus rubellus*. *Appl Environ Microbiol* 68:1265–79.
- 561 39. Schönholzer F, Hahn D, Zarda B, Zeyer J. 2002. Automated image analysis and in situ  
562 hybridization as tools to study bacterial populations in food resources, gut and cast of  
563 *Lumbricus terrestris* L. *J Microbiol Methods* 48:53–68.
- 564 40. Nechitaylo TY, Timmis KN, Golyshin PN. 2009. “*Candidatus Lumbricincola*”, a novel  
565 lineage of uncultured Mollicutes from earthworms of family Lumbricidae. *Environ*  
566 *Microbiol* 11:1016–26.
- 567 41. Ba Q, Li M, Chen P, Huang C, Duan X, Lu L, Li J, Chu R, Xie D, Song H, Wu Y, Ying H,  
568 Jia X, Wang H. 2016. Gender-Dependent Effects of Cadmium Exposure in Early Life on  
569 Gut Microbiota and Fat Accumulation in Mice. *Environ Health Perspect* 125:1–5.

- 570 42. Ellis RJ, Morgan P, Weightman AJ, Fry JC. 2003. Cultivation-dependent and -independent  
571 approaches for determining bacterial diversity in heavy-metal-contaminated soil. Appl  
572 Environ Microbiol 69:3223–3230.
- 573 43. Sułowicz S, Płociniczak T, Piotrowska-Seget Z, Kozdrój J. 2011. Significance of silver  
574 birch and bushgrass for establishment of microbial heterotrophic community in a metal-  
575 mine spoil heap. Water Air Soil Pollut 214:205–218.
- 576 44. Evtushenko LI, Ariskina E V. 2012. Bergey's Manual of Systematic Bacteriology, Volume  
577 5: The Actinobacteria, Family II: Nocardioidaceae. Springer-Verlag New York.
- 578 45. Sani R, Peyton B, Smith W, Apel W, Petersen J. 2002. Dissimilatory reduction of Cr(VI),  
579 Fe(III), and U(VI) by *Cellulomonas* isolates. Appl Microbiol Biotechnol 60:192–199.
- 580 46. Hegazi RM, El-Gendy NS, El-Feky AA, Moustafa YM, El-Ezbewy S, El-Gemae GH.  
581 2007. Impact of heavy metals on biodegradation of phenanthrene by *Cellulomonas*  
582 *hominis* strain N2. J Pure Appl Microbiol 1:165–175.
- 583 47. Govarathanan M, Mythili R, Selvankumar T, Kamala-Kannan S, Rajasekar A, Chang Y-C.  
584 2016. Bioremediation of heavy metals using an endophytic bacterium *Paenibacillus* sp.  
585 RM isolated from the roots of *Tridax procumbens*. 3 Biotech 6:242.
- 586 48. Rawat M, Rai JPN. 2012. Adsorption of Heavy Metals by *Paenibacillus validus* Strain  
587 MP5 Isolated from Industrial Effluent–Polluted Soil. Bioremediat J 16:66–73.
- 588 49. Rajbanshi A. 2009. Study on Heavy Metal Resistant Bacteria in Guheswori Sewage  
589 Treatment Plant. Our Nat 6:52–57.
- 590 50. Benmalek Y, Halouane A, Hacene H, Fardeau ML. 2014. Resistance to heavy metals and  
591 bioaccumulation of lead and zinc by *Chryseobacterium solincola* strain 1YB-R12T

- 592 isolated from soil. *Int J Environ Eng* 6:68.
- 593 51. Mosa KA, Saadoun I, Kumar K, Helmy M, Dhankher OP. 2016. Potential  
594 Biotechnological Strategies for the Cleanup of Heavy Metals and Metalloids. *Front Plant*  
595 *Sci* 7:303.
- 596 52. Xie P, Hao X, Herzberg M, Luo Y, Nies DH, Wei G. 2015. Genomic analyses of metal  
597 resistance genes in three plant growth promoting bacteria of legume plants in Northwest  
598 mine tailings, China. *J Environ Sci* 27:179–187.
- 599 53. Zhang M, Huang F, Wang G, Liu X, Wen J, Zhang X, Huang Y, Xia Y. 2017. Geographic  
600 distribution of cadmium and its interaction with the microbial community in the Longjiang  
601 River: risk evaluation after a shocking pollution accident. *Sci Rep* 7:227.
- 602 54. De Cáceres M, Legendre P. 2009. Associations between species and groups of sites:  
603 indices and statistical inference. *Ecology* 90:3566–74.
- 604 55. Li F, Hullar MAJ, Schwarz Y, Lampe JW. 2009. Human Gut Bacterial Communities Are  
605 Altered by Addition of Cruciferous Vegetables to a Controlled Fruit-and Vegetable-Free  
606 Diet 1–3. *J Nutr* 139:1685–1691.
- 607 56. Galimanas V, Hall M, Singh N, Lynch MD, Goldberg M, Tenenbaum H, Cvitkovitch D,  
608 Neufeld J, Senadheera D. 2014. Bacterial community composition of chronic periodontitis  
609 and novel oral sampling sites for detecting disease indicators. *Microbiome* 2:32.
- 610 57. Kembel SW, Jones E, Kline J, Northcutt D, Stenson J, Womack AM, Bohannan BJ, Brown  
611 GZ, Green JL. 2012. Architectural design influences the diversity and structure of the built  
612 environment microbiome. *ISME J* 6:1469–1479.
- 613 58. Horn MA, Ihssen J, Matthies C, Schramm A, Acker G, Drake HL. 2005. *Dechloromonas*

- 614           denitrificans sp. nov., *Flavobacterium denitrificans* sp. nov., *Paenibacillus anaericanus* sp.  
615           nov. and *Paenibacillus terrae* strain MH72, N<sub>2</sub>O-producing bacteria isolated from the gut  
616           of the earthworm *Aporrectodea caliginosa*. *Int J Syst Evol Microbiol* 55:1255–1265.
- 617 59. Kumar V, Bharti A, Negi YK, Gusain O, Pandey P, Bisht GS. 2012. Screening of  
618           actinomycetes from earthworm castings for their antimicrobial activity and industrial  
619           enzymes. *Braz J Microbiol* 43:205–14.
- 620 60. Polyanskaya LM, Babkina NI, Zenova GM, Zvyagintsev DG. 1996. Fate of actinomycetes  
621           in the intestinal tract of soil invertebrates fed on streptomycete spores. *Microbiol New*  
622           York 65:493–498.
- 623 61. Park J, Lee PA, Lee H-H, Choi K, Lee S-W, Seo Y-S. 2017. Comparative Genome  
624           Analysis of *Rathayibacter tritici* NCPPB 1953 with *Rathayibacter toxicus* Strains Can  
625           Facilitate Studies on Mechanisms of Nematode Association and Host Infection. *plant*  
626           Pathol J 33:370–381.
- 627 62. Aira M, Olcina J, Pérez-Losada M, Domínguez J. 2016. Characterization of the bacterial  
628           communities of casts from *Eisenia andrei* fed with different substrates. *Appl Soil Ecol*  
629           98:103–111.
- 630 63. Kim H-J, Shin K-H, Cha C-J, Hur H-G. 2004. Analysis of Aerobic and Culturable  
631           Bacterial Community Structures in Earthworm (*Eisenia fetida*) Intestine. *Agric Chem*  
632           Biotechnol 47:137–142.
- 633 64. Verma K, Agrawal N, Farooq M, Misra RB, Hans RK. 2006. Endosulfan degradation by a  
634           *Rhodococcus* strain isolated from earthworm gut. *Ecotoxicol Environ Saf* 64:377–381.
- 635 65. Joshi A, Jaiswal P. 2013. Micro organisms living in zinc contaminated soil -a review.

- 636 IOSR J Pharm Biol Sci 6:67–72.
- 637 66. Corretto E, Antonielli L, Sessitsch A, Compant S, Höfer C, Puschenreiter M, Brader G.  
638 2017. Complete genome sequence of the heavy metal resistant bacterium *Agromyces*  
639 *aureus* AR33T and comparison with related Actinobacteria. *Stand Genomic Sci* 12:2.
- 640 67. Vela-Cano M, Castellano-Hinojosa A, Vivas AF, Victoria M, Toledo M. 2014. Effect of  
641 Heavy Metals on the Growth of Bacteria Isolated from Sewage Sludge Compost Tea. *Adv*  
642 *Microbiol* 4:644–655.
- 643 68. Goswami L, Arul Manikandan N, Pakshirajan K, Pugazhenth G. 2017. Simultaneous  
644 heavy metal removal and anthracene biodegradation by the oleaginous bacteria  
645 *Rhodococcus opacus*. *3 Biotech* 7:37.
- 646 69. Anwar M, Ali S, Asaad AT. 2017. Evaluation of Heavy Metals Resistant *Micrococcus* sp.  
647 Isolated from Rivers in Basra, Iraq. *J Bioremediation Biodegrad* 8:1–4.
- 648 70. Montero-Calasanz M del C, Hofner B, Göker M, Rohde M, Spröer C, Hezbri K, Gtari M,  
649 Schumann P, Klenk H-P. 2014. *Geodermatophilus poikilotrophi* sp. nov.: a multitolerant  
650 actinomycete isolated from dolomitic marble. *Biomed Res Int* 2014:914767.
- 651 71. Kant R, van Passel MWJ, Palva A, Lucas S, Lapidus A, Glavina del Rio T, Dalin E, Tice  
652 H, Bruce D, Goodwin L, Pitluck S, Larimer FW, Land ML, Hauser L, Sangwan P, de Vos  
653 WM, Janssen PH, Smidt H. 2011. Genome sequence of *Chthoniobacter flavus* Ellin428, an  
654 aerobic heterotrophic soil bacterium. *J Bacteriol* 193:2902–3.
- 655 72. Panke-Buisse K, Poole AC, Goodrich JK, Ley RE, Kao-Kniffin J. 2014. Selection on soil  
656 microbiomes reveals reproducible impacts on plant function. *ISME J* 9:980–989.
- 657 73. Vishnivetskaya TA, Mosher JJ, Palumbo A V, Yang ZK, Podar M, Brown SD, Brooks SC,

- 658 Gu B, Southworth GR, Drake MM, Brandt CC, Elias DA. 2011. Mercury and other heavy  
659 metals influence bacterial community structure in contaminated Tennessee streams. *Appl*  
660 *Environ Microbiol* 77:302–11.
- 661 74. Byzov BA, Nechitaylo TY, Bumazhkin BK, Kurakov A V., Golyshin PN, Zvyagintsev  
662 DG. 2009. Culturable microorganisms from the earthworm digestive tract. *Microbiology*  
663 78:360–368.
- 664 75. Drewniak L, Krawczyk PS, Mielnicki S, Adamska D, Sobczak A, Lipinski L, Burec-  
665 Drewniak W, Sklodowska A. 2016. Physiological and Metagenomic Analyses of  
666 Microbial Mats Involved in Self-Purification of Mine Waters Contaminated with Heavy  
667 Metals. *Front Microbiol* 7:1252.
- 668 76. Caporaso JG, Lauber CL, Walters WA, Berg-Lyons D, Huntley J, Fierer N, Owens SM,  
669 Betley J, Fraser L, Bauer M, Gormley N, Gilbert JA, Smith G, Knight R. 2012. Ultra-high-  
670 throughput microbial community analysis on the Illumina HiSeq and MiSeq platforms.  
671 *ISME J* 6:1621–1624.
- 672 77. Kuczynski J, Lauber CL, Walters WA, Parfrey LW, Clemente JC, Gevers D, Knight R.  
673 2011. Experimental and analytical tools for studying the human microbiome. *Nat Rev*  
674 *Genet* 13:47–58.
- 675 78. Caporaso JG, Kuczynski J, Stombaugh J, Bittinger K, Bushman FD, Costello EK, Fierer  
676 N, Peña AG, Goodrich JK, Gordon JI, Huttley GA, Kelley ST, Knights D, Koenig JE, Ley  
677 RE, Lozupone CA, McDonald D, Muegge BD, Pirrung M, Reeder J, Sevinsky JR,  
678 Turnbaugh PJ, Walters WA, Widmann J, Yatsunenko T, Zaneveld J, Knight R. 2010.  
679 QIIME allows analysis of high-throughput community sequencing data. *Nat Methods*

- 680 7:335–336.
- 681 79. Callahan BJ, McMurdie PJ, Rosen MJ, Han AW, Johnson AJA, Holmes SP. 2016.  
682 DADA2: High-resolution sample inference from Illumina amplicon data. *Nat Methods*  
683 13:581–583.
- 684 80. Katoh K, Standley DM. 2013. MAFFT Multiple Sequence Alignment Software Version 7:  
685 Improvements in Performance and Usability. *Mol Biol Evol* 30:772–780.
- 686 81. Price MN, Dehal PS, Arkin AP. 2010. FastTree 2 – Approximately Maximum-Likelihood  
687 Trees for Large Alignments. *PLoS One* 5:e9490.
- 688 82. Faith DP. 1992. Conservation evaluation and phylogenetic diversity. *Biol Conserv* 61:1–  
689 10.
- 690 83. Lozupone CA, Hamady M, Kelley ST, Knight R. 2007. Quantitative and qualitative beta  
691 diversity measures lead to different insights into factors that structure microbial  
692 communities. *Appl Environ Microbiol* 73:1576–85.
- 693 84. R Development Core Team. 2011. R: A Language and Environment for Statistical  
694 Computing. Vienna, Austria : the R Foundation for Statistical Computing.
- 695 85. McDonald D, Clemente JC, Kuczynski J, Rideout JR, Stombaugh J, Wendel D, Wilke A,  
696 Huse S, Hufnagle J, Meyer F, Knight R, Caporaso JG. 2012. The Biological Observation  
697 Matrix (BIOM) format or: how I learned to stop worrying and love the ome-ome.  
698 *Gigascience* 1:7.
- 699 86. McMurdie PJ, Holmes S. 2013. phyloseq: An R Package for Reproducible Interactive  
700 Analysis and Graphics of Microbiome Census Data. *PLoS One* 8:e61217.
- 701 87. Csardi G, Nepusz T. 2006. The Igraph Software Package for Complex Network Research.



- 702 InterJournal Complex Sy:1695.
- 703 88. Maintainer MB, Bojanowski M. 2016. Title Coercion Routines for Network Data Objects.
- 704 89. Hunter DR, Handcock MS, Butts CT, Goodreau SM, Morris M. 2008. ergm: A Package to  
705 Fit, Simulate and Diagnose Exponential-Family Models for Networks. JSS J Stat Softw  
706 24.
- 707 90. Love MI, Huber W, Anders S. 2014. Moderated estimation of fold change and dispersion  
708 for RNA-seq data with DESeq2. Genome Biol 15:550.
- 709

710 **Figure captions**

711 **Figure 1.** Schematic representation of the experimental setup. Earthworms were exposed to  
712 heavy metal (Cd) and their gut microbiota were sequenced before and after exposure to various  
713 Cd concentrations. The respective soil and manure microbiotas were also sequenced.

714 **Figure 2.**  $\alpha$  diversity boxplots representing Faith's Phylogenetic Diversity (PD) between  
715 treatment groups, soil and manure samples. Soil and manure samples have a higher PD compared  
716 with earthworm gut microbiota, independent of treatment group.

717 **Figure 3.** Proportions (%) of the most abundant phyla in the various earthworm treatment groups  
718 and in the soil and manure samples. Proteobacteria was the bacterial phylum with the highest  
719 proportion in all groups, other than for Soil\_acc in which the phylum Firmicutes predominated.

720 **Figure 4.** PCoA plot based on the weighted UniFrac matrix revealed the clustering according to  
721 the treatment groups relative to the control group.

722 **Figure 5.** A network graph showing the connectedness between earthworm gut microbiota  
723 according to treatment group.

724 **Figure 6.** Results of DESeq2 analyses showing log<sub>2</sub>-fold changes of bacterial taxa for  
725 comparisons between Cd-0\_post and Cd-10\_post and between Cd-0\_post and Cd-50\_post.

726 **Figure 7.** Indicator species that significantly characterize treatment groups after earthworm  
727 exposure. An indicator value of 1 indicates that a certain SV is present in all individuals of a  
728 group. An indicator value less than 1 means that the SV is either present in more than one group  
729 or that it is not present in all members of this group.

730

731

732 **Table**

733 Table 1. Relative proportion (%) of various Proteobacteria classes in treatment groups, soil and  
734 manure samples.

|                    | alphaproteobacteria | betaproteobacteria | gammaproteobacteria | deltaproteobacteria |
|--------------------|---------------------|--------------------|---------------------|---------------------|
| Cd-0_pre           | 5.89                | 3.99               | 20.26               | 2.06                |
| Cd-10_pre          | 6.17                | 3.98               | 20.70               | 2.21                |
| Cd-50_pre          | 5.90                | 3.96               | 21.10               | 1.92                |
| Cd-0_post          | 4.73                | 4.81               | 24.86               | 0.01                |
| Cd-10_post         | 5.47                | 4.59               | 27.49               | 0.04                |
| Cd-50_post         | 6.04                | 5.32               | 25.65               | 0.12                |
| Manure             | 14.37               | 9.18               | 32.65               | 0.02                |
| Soil_acc           | 15.36               | 2.51               | 7.03                | 1.20                |
| Soil_Cd-0_pre      | 17.52               | 12.62              | 16.06               | 1.38                |
| Soil_Cd-0_post     | 16.95               | 15.09              | 11.99               | 0.09                |
| Soil_Cd-10/50_post | 17.90               | 14.63              | 13.72               | 0.58                |

735

Soil\_acc

Manure

Soil and manure  
sampling

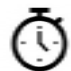

Adding of 90 earthworms to soil

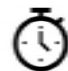

4 week acclimation

4 week acclimation

Cd-0\_pre

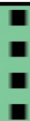

Cd-10\_pre

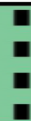

Cd-50\_pre

Soil and earthworm  
gut sampling

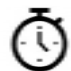

Split in control and Cd treatments

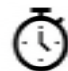

4 week treatment

4 week treatment

Cd-0\_post

Cd-10\_post

Cd-50\_post

Soil and earthworm  
gut sampling

Phylogenetic diversity (PD)

50 -  
40 -  
30 -  
20 -

Cd-0\_pre (n=29) -

Cd-10\_pre (n=29) -

Cd-50\_pre (n=27) -

Cd-0\_post (n=29) -

Cd-10\_post (n=26) -

Cd-50\_post (n=24) -

Manure (n=3) -

Soil\_acc (n=3) -

Soil\_Cd-0\_pre (n=3) -

Soil\_Cd-0\_post (n=2) -

Soil\_Cd-10/50\_post (n=3) -

Treatment

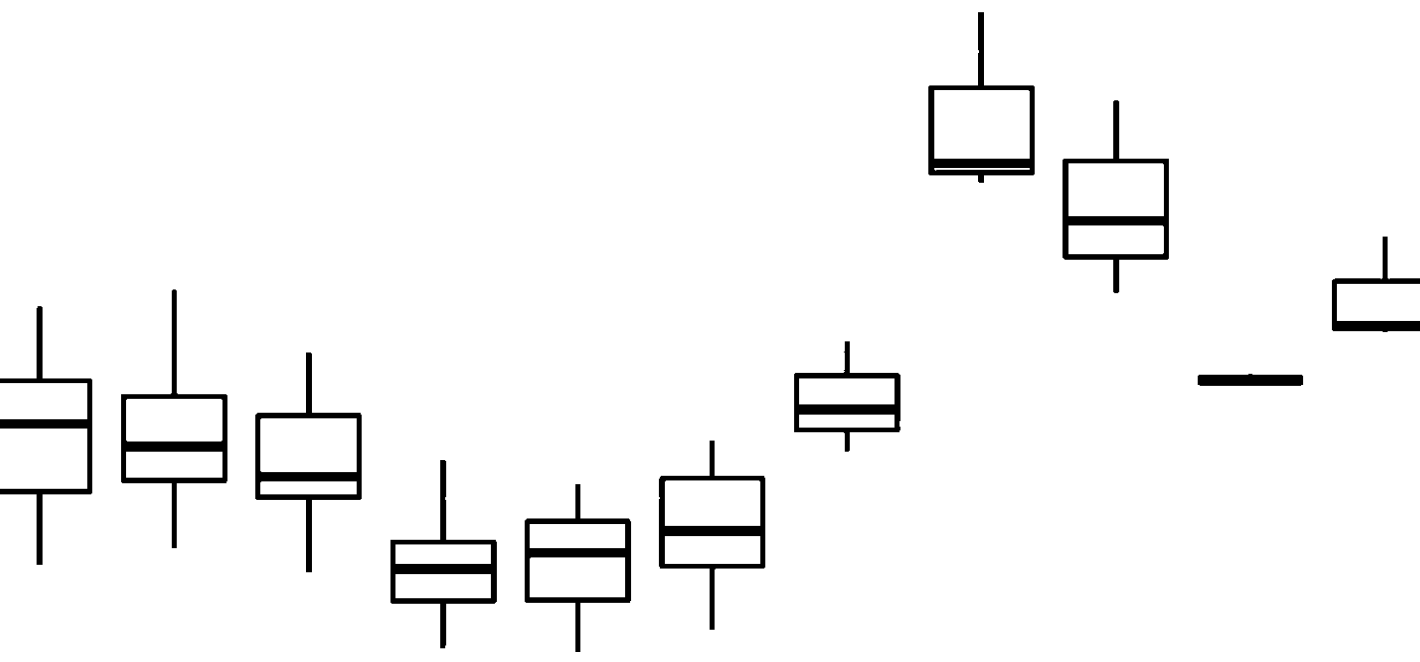

Relative abundance

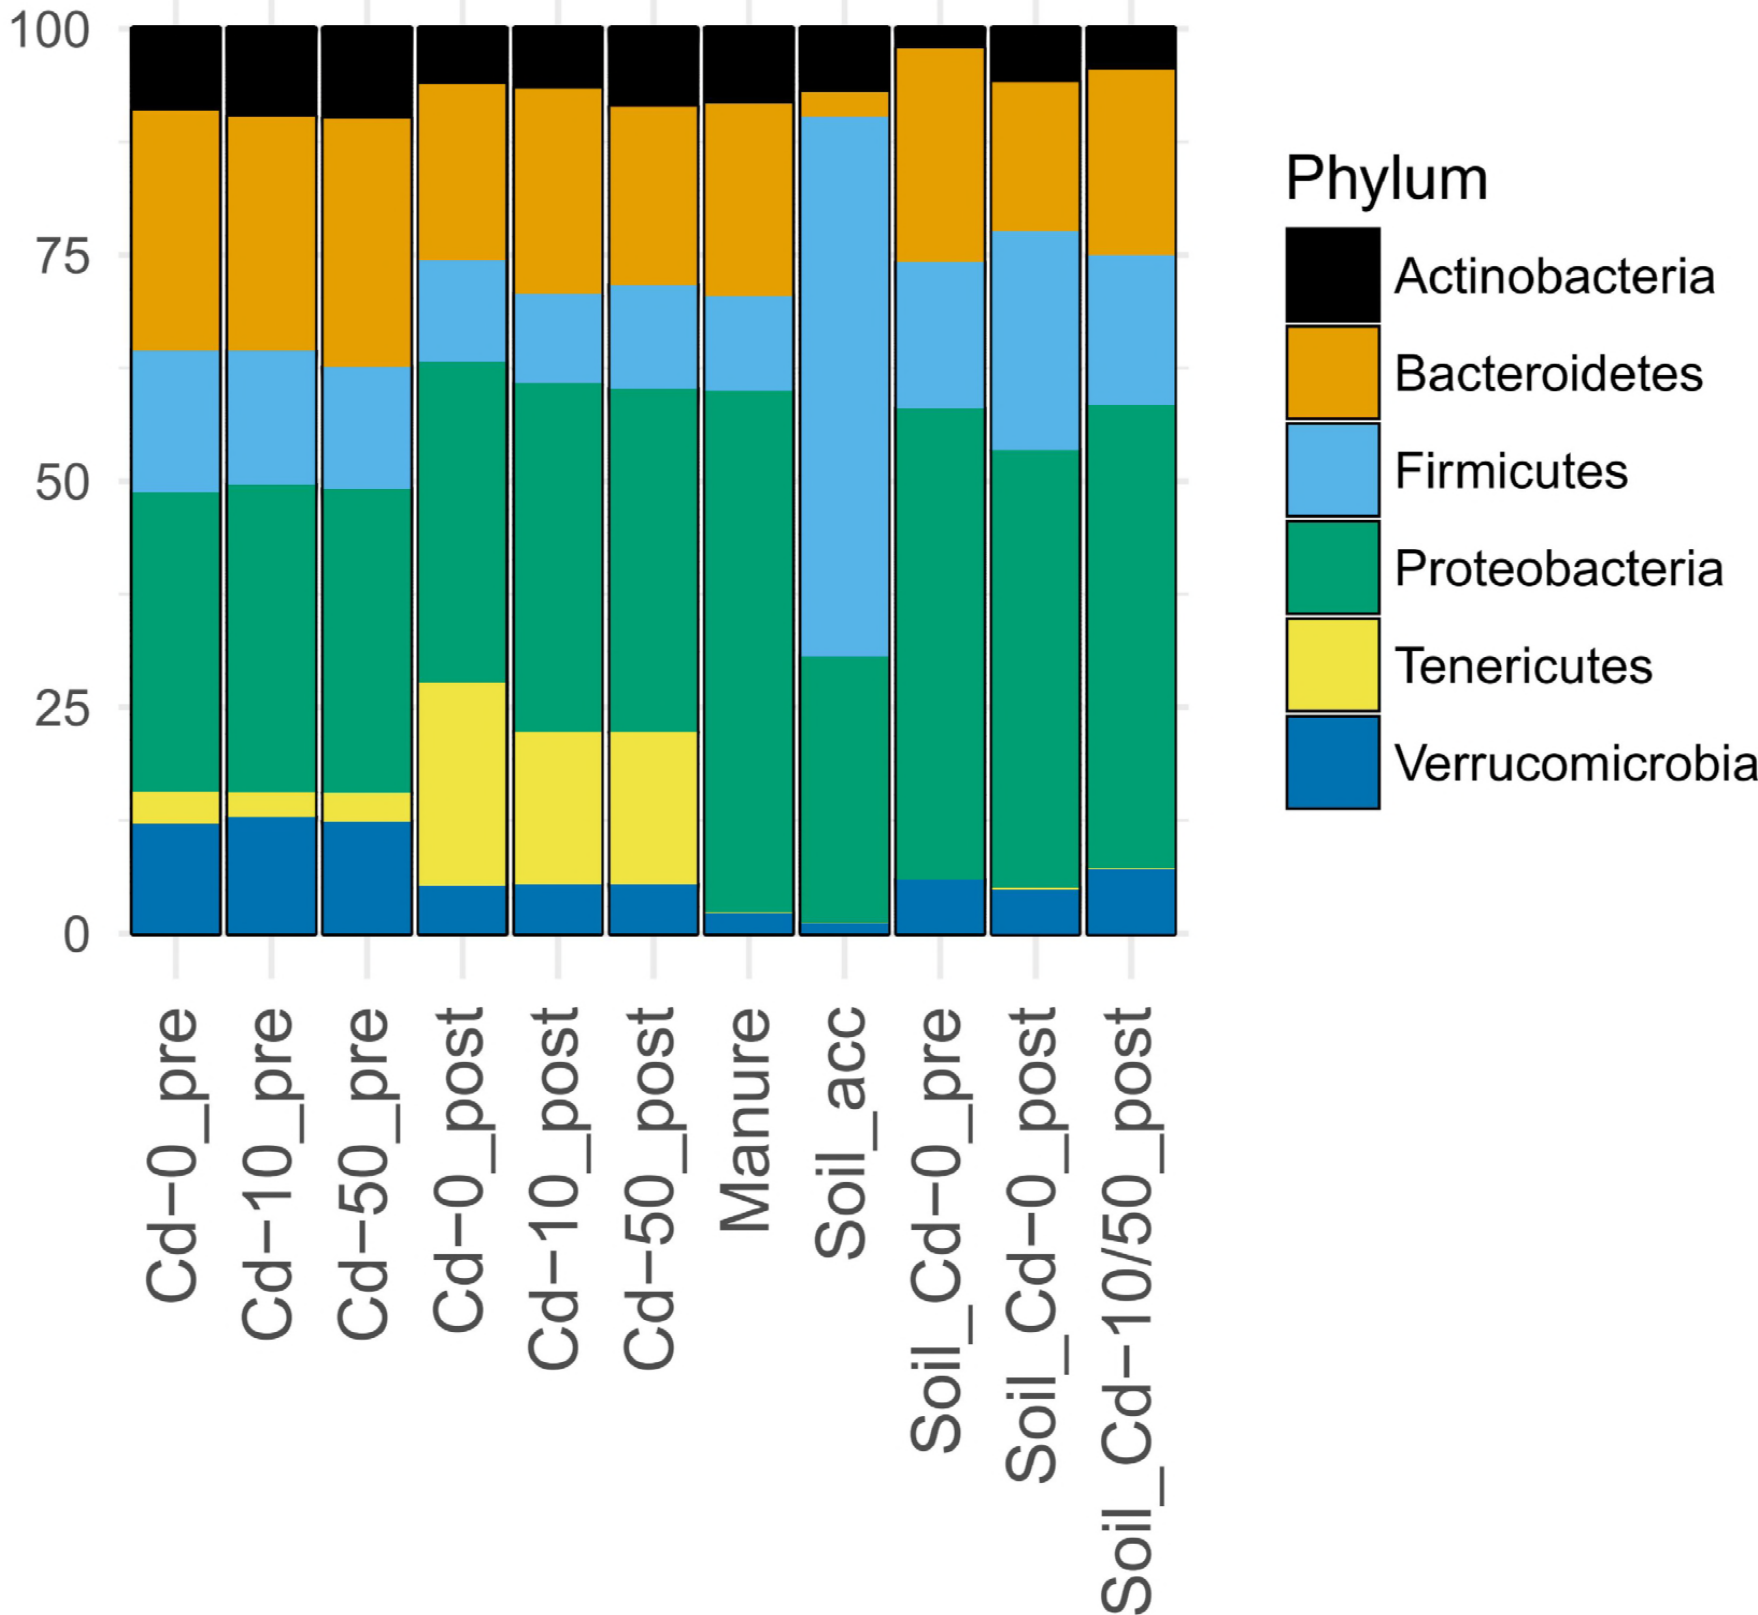



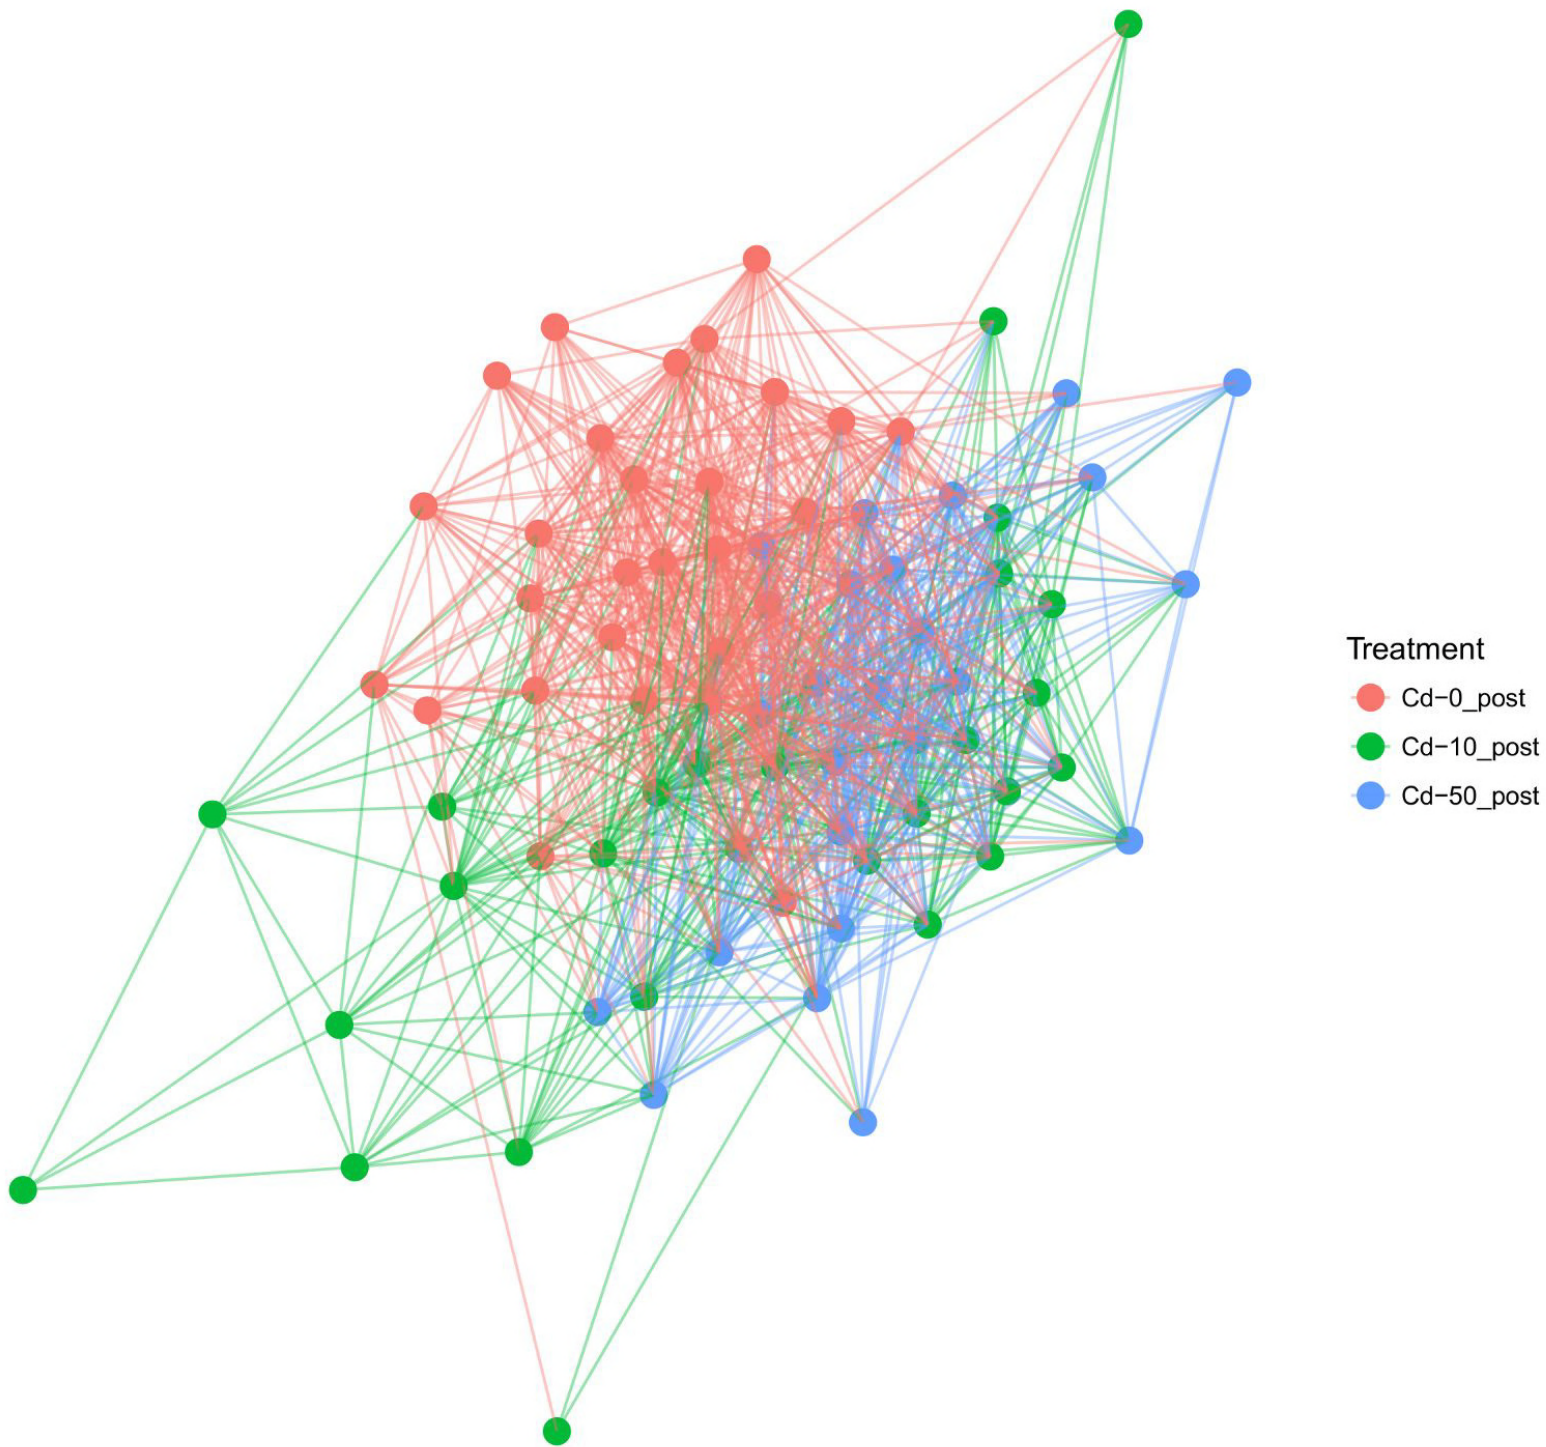



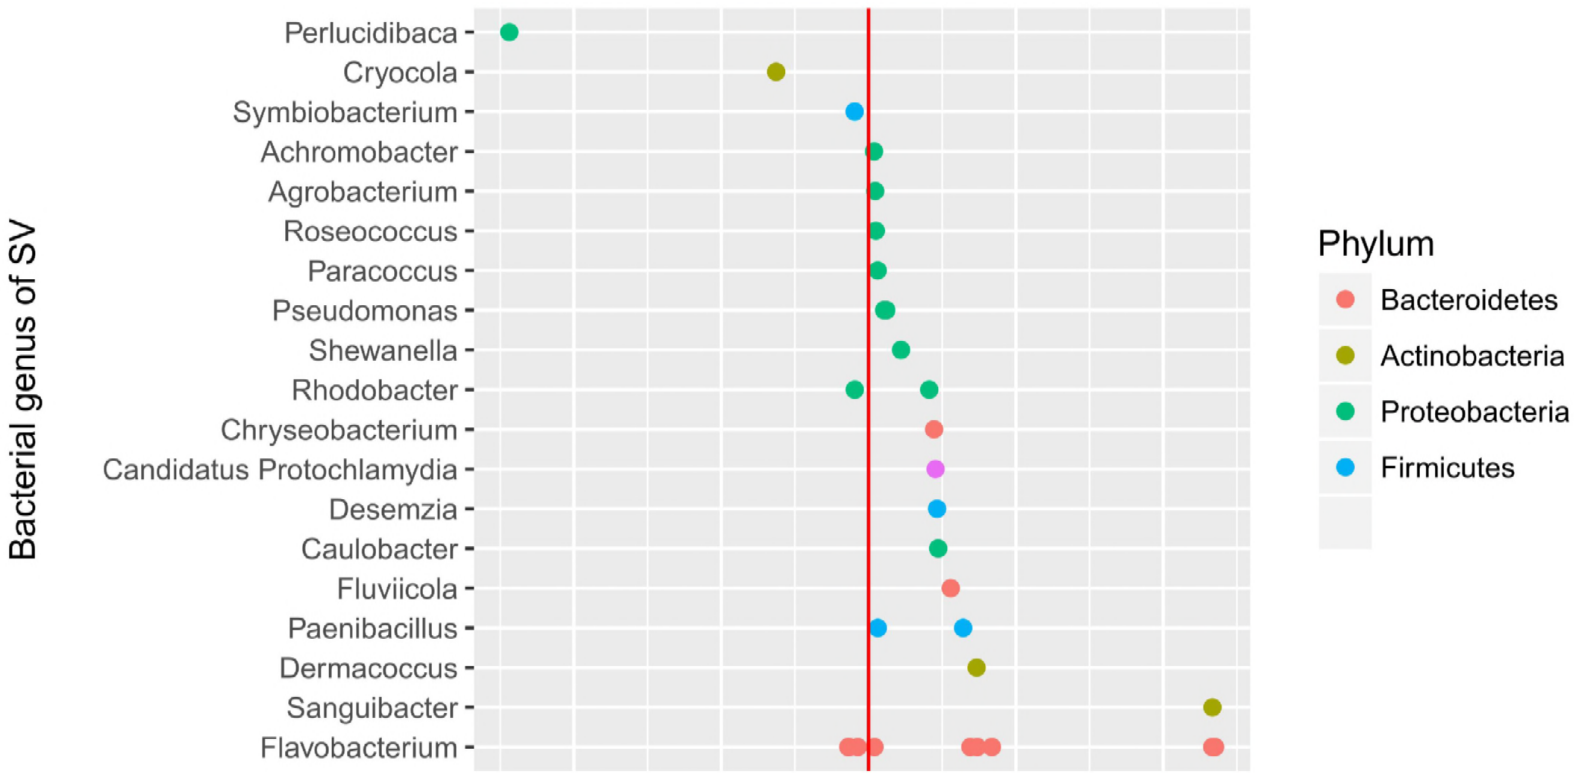

b) Cd-0\_post vs. Cd-50\_post

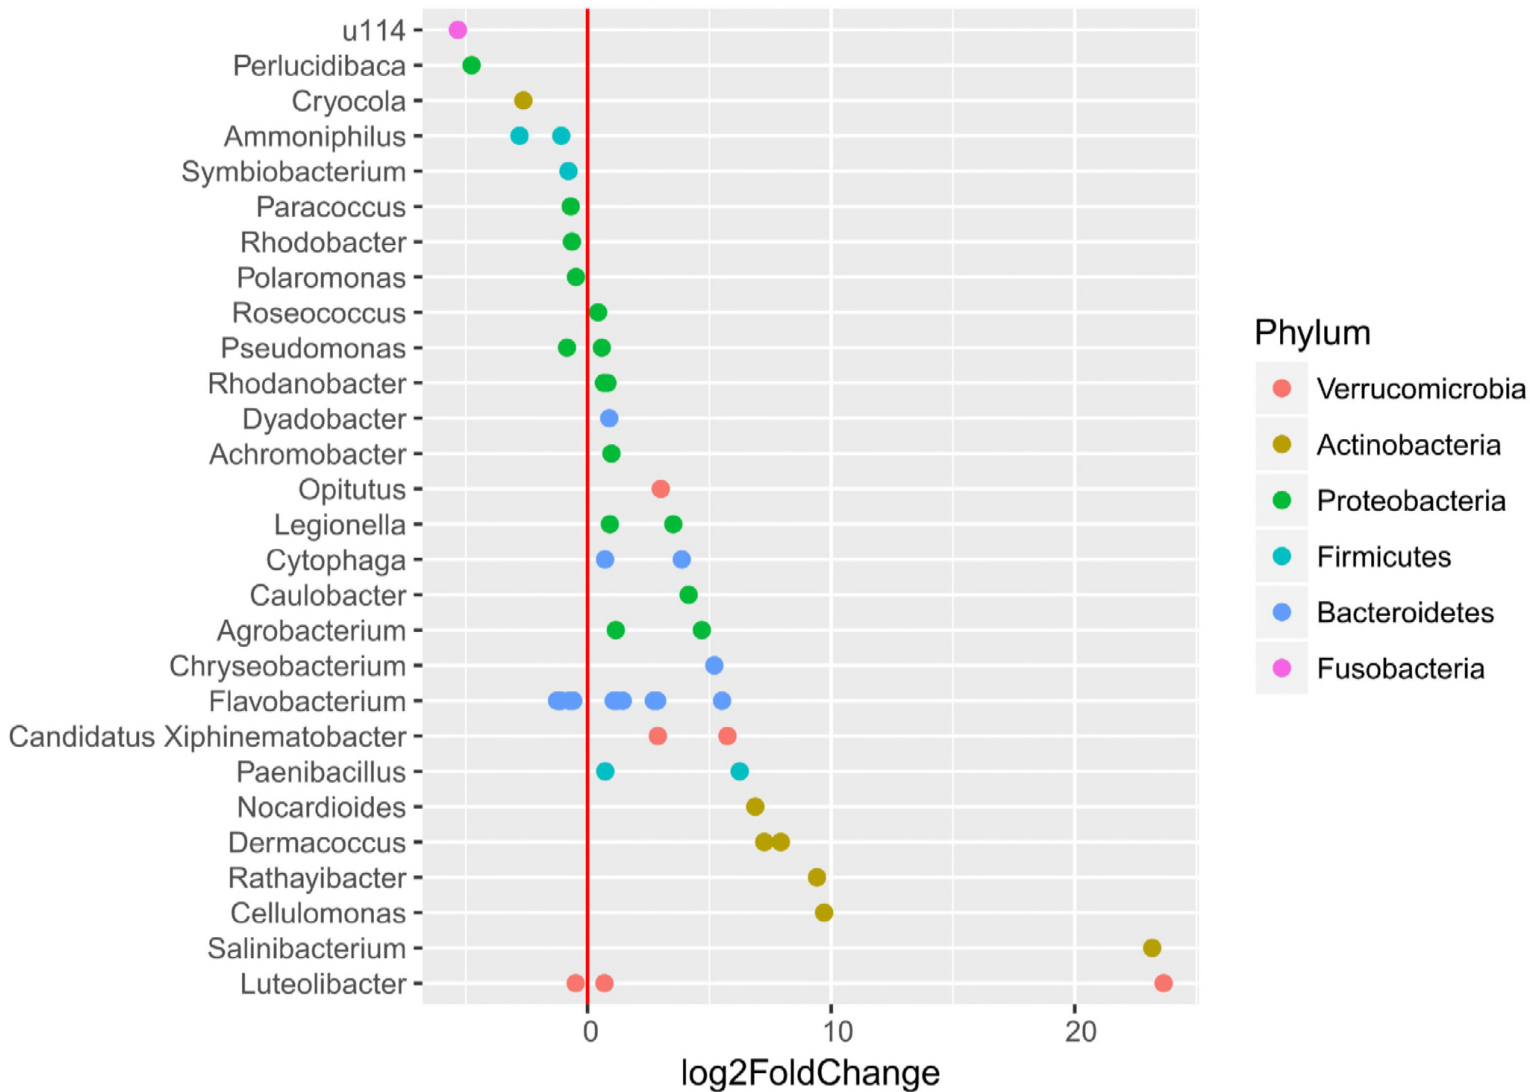

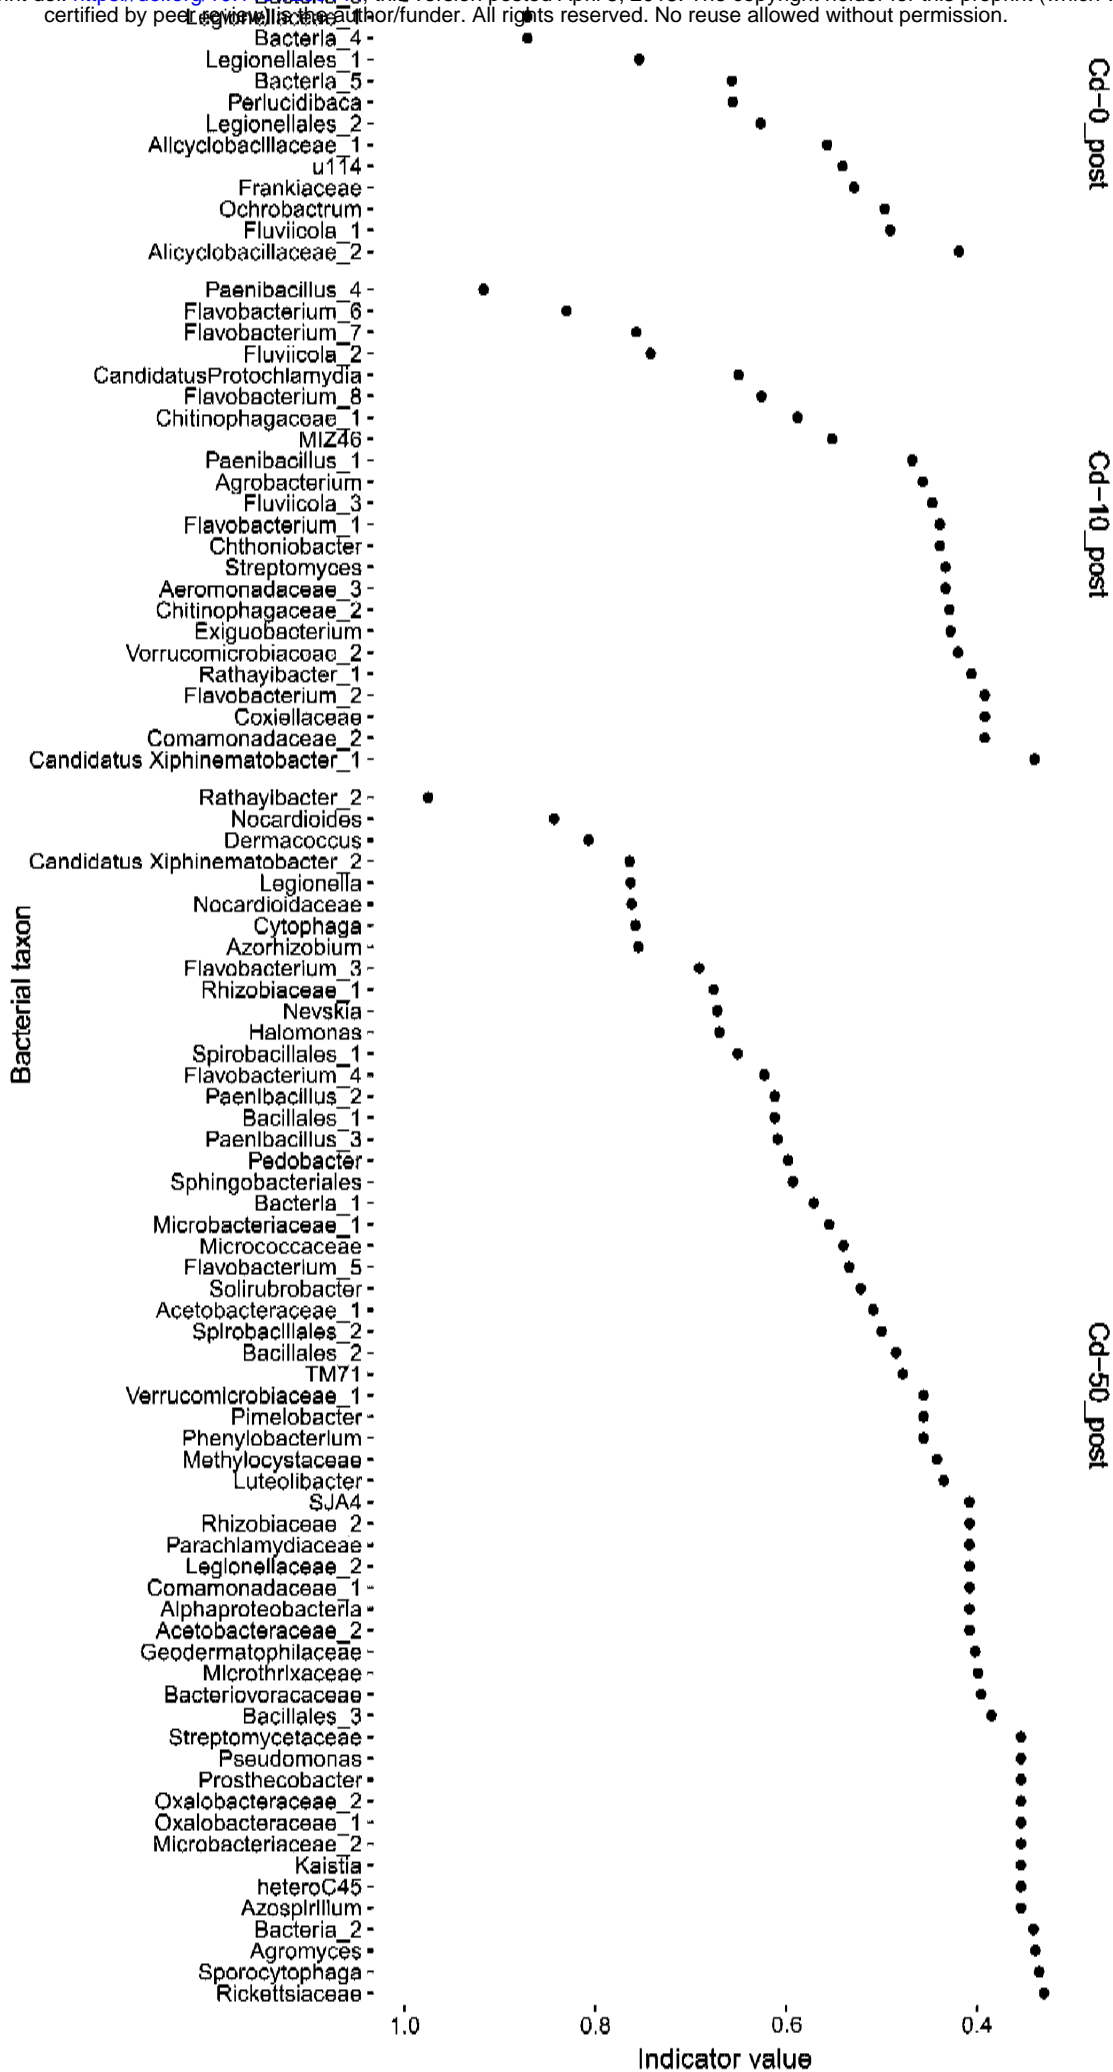

Source: https://www.biorxiv.org/content/10.1101/295444v1.full.pdf
